# Supplementary material for: Pulsed laser in liquid grafting of gold nanoparticle–carbon support composites
Source: publisher site journal article supplement (doi:10.3762/bjnano.16.26), 2025-03-07
Supplement: Additional file 1 [file 2190-4286-16-26-S1.pdf]

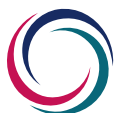

## Supporting Information

for

### **Pulsed laser in liquid grafting of gold nanoparticle–carbon support composites**

Madeleine K. Wilsey, Teona Taseska, Qishen Lyu, Connor P. Cox and Astrid M. Müller

*Beilstein J. Nanotechnol.* **2025**, *16*, 349–361. [doi:10.3762/bjnano.16.26](https://doi.org/10.3762/bjnano.16.26)

### **Photographs of the pulsed laser grafting setup, GC data, EDX spectra, and relative contents of XPS species**

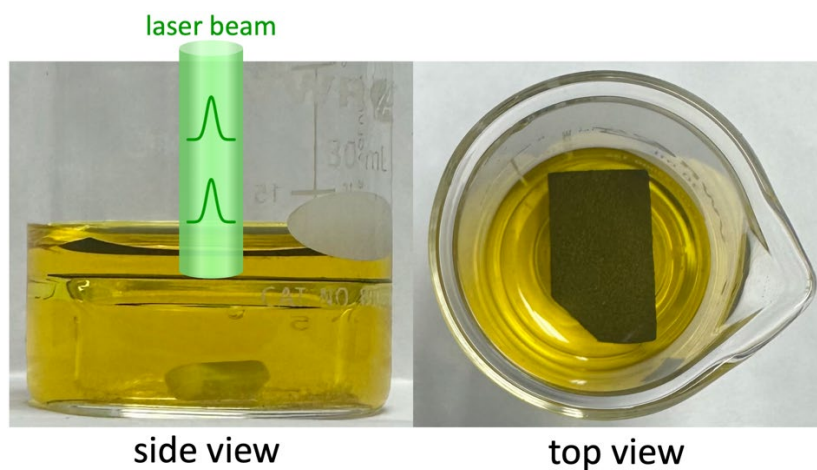

**Figure S1:** Photographs of the pulsed laser grafting setup for fabricating gold nanoparticles on hydrophilic carbon fiber paper from aqueous  $\text{HAuCl}_4$  solution. In the side view, the total reflection of the carbon fiber paper is visible as a photography artifact.

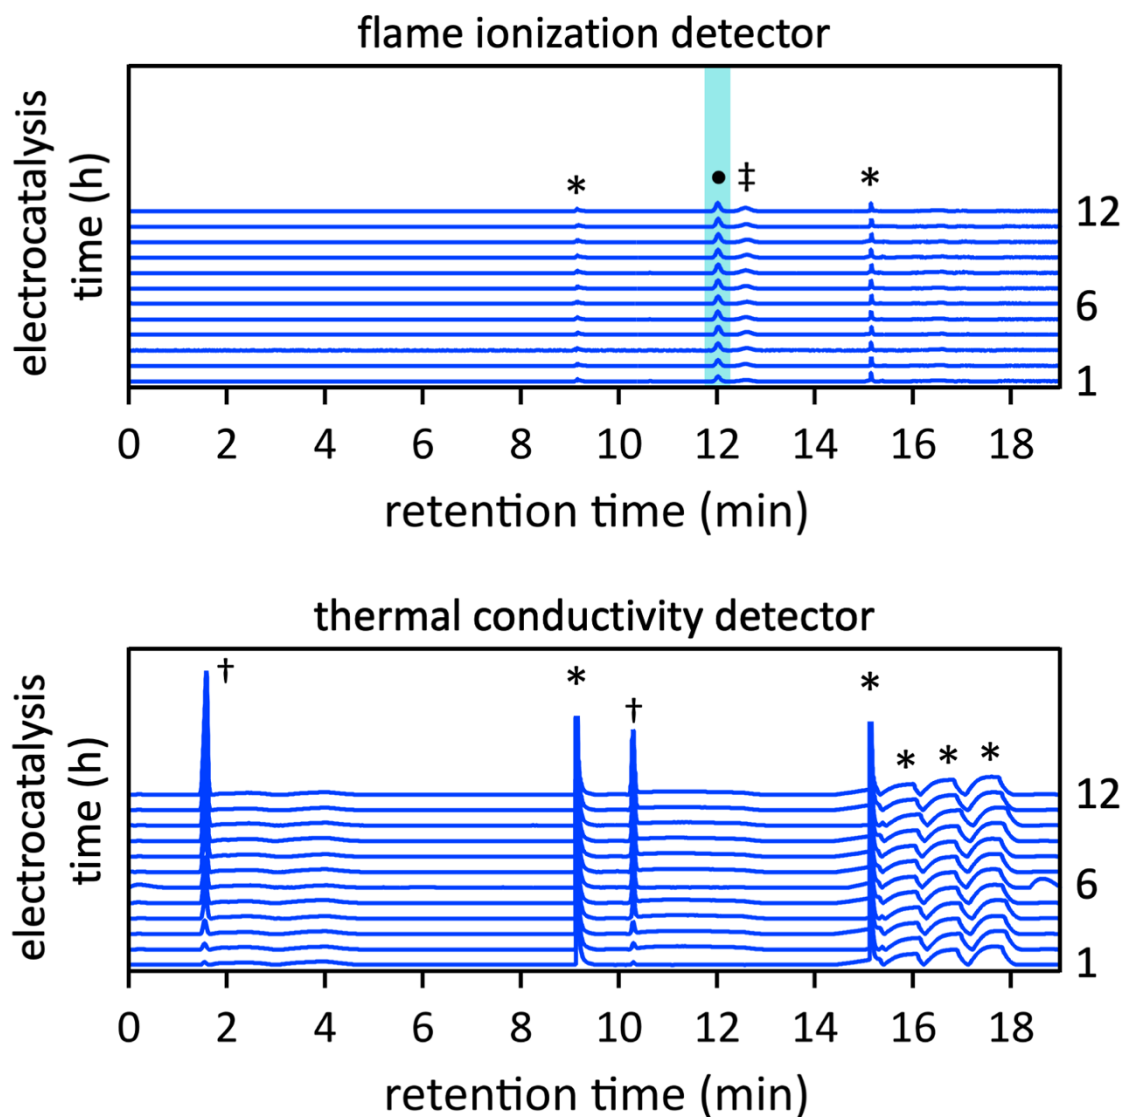

**Figure S2:** GC data as a function of electrocatalysis time for electrocatalytic aqueous bicarbonate reduction at  $-10 \text{ mA}\cdot\text{cm}^{-2}$ . Symbols: (•) denotes  $\text{CO}_2$  detection (highlighted in cyan, peak areas are shown in Figure S3), (†) denotes  $\text{H}_2$  detection, (\*) denotes signals due to valve switches, and (‡) denotes GC artifacts.

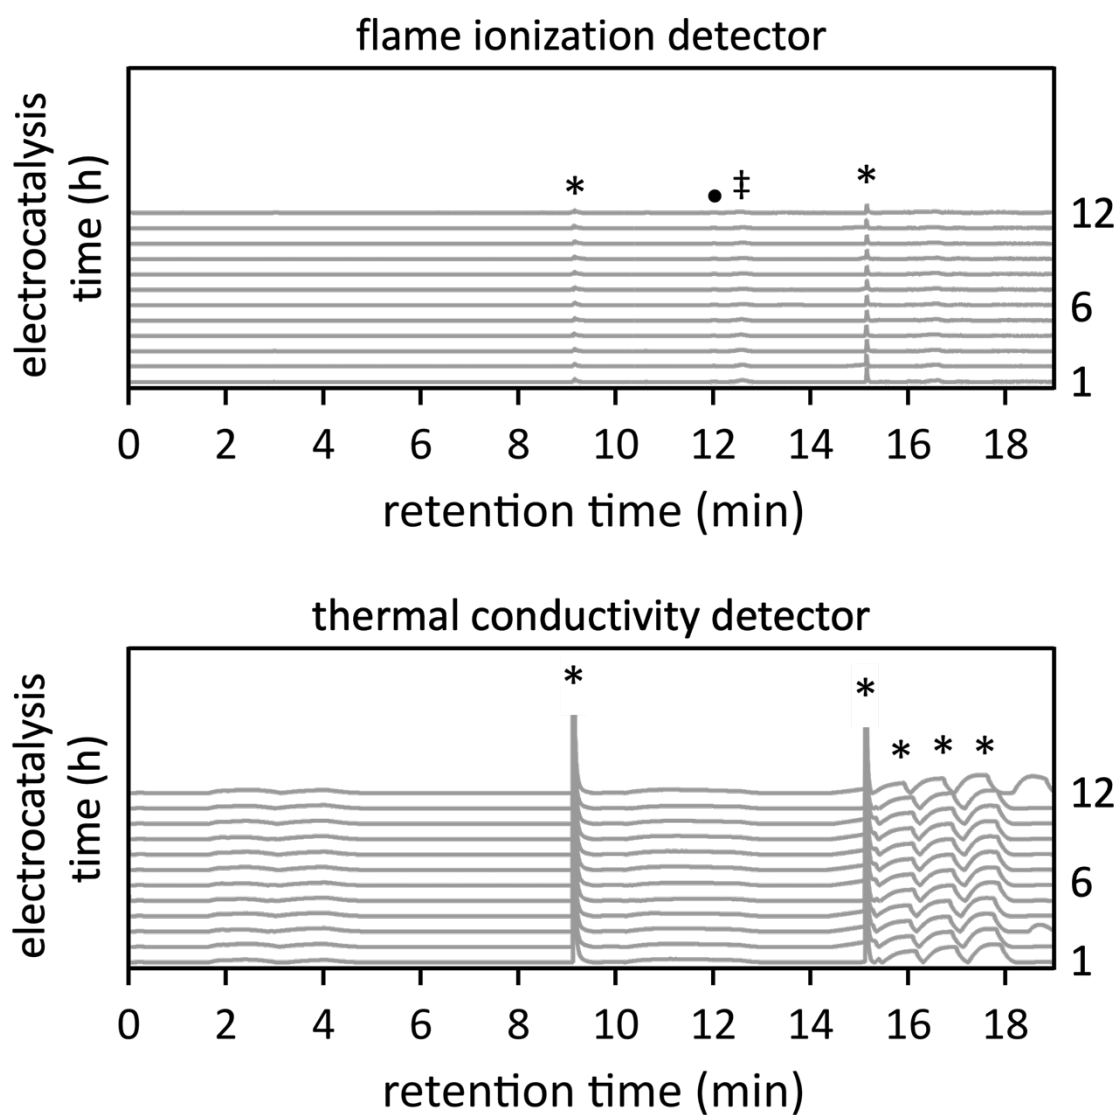

**Figure S3:** GC data as a function of electrocatalysis time for electrocatalytic aqueous bicarbonate reduction at open circuit potential. Symbols: (•) denotes CO<sub>2</sub> detection, (\*) denotes signals due to valve switches, and (‡) denotes GC artifacts.

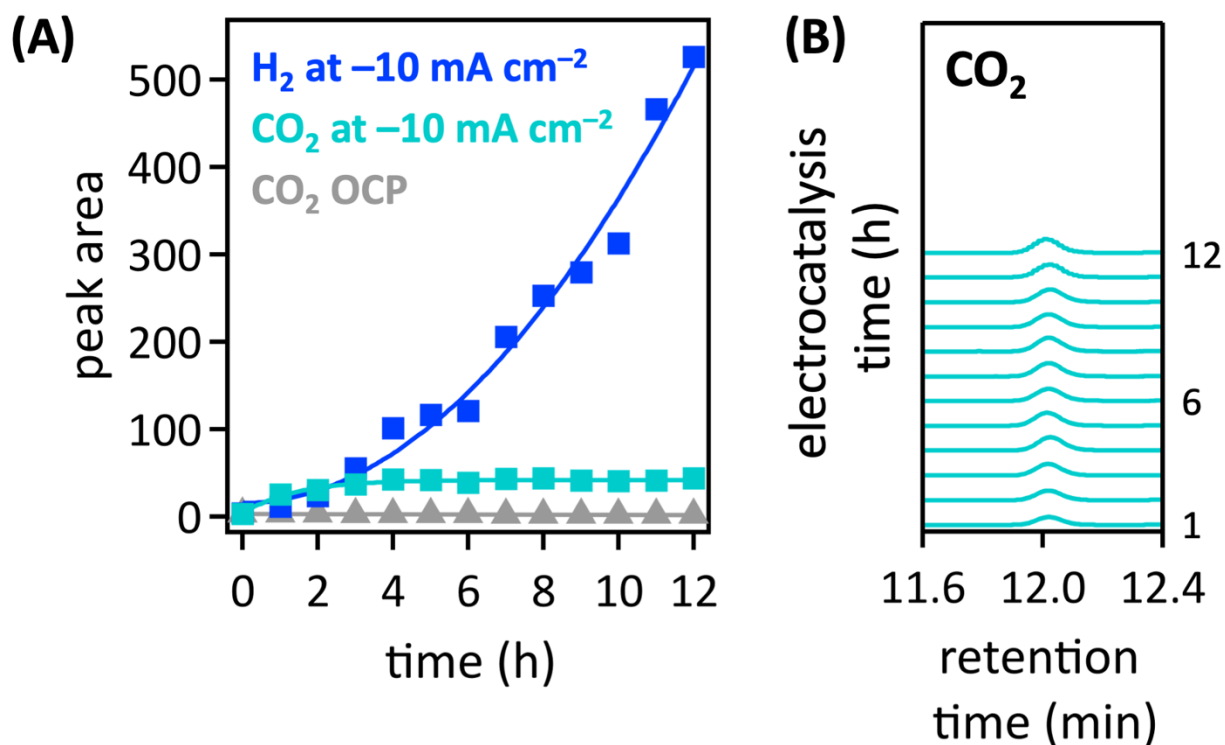

**Figure S4:** Electrocatalytic product generation; colors: blue,  $\text{H}_2$  at a constant current density of  $-10 \text{ mA} \cdot \text{cm}^{-2}$ , cyan,  $\text{CO}_2$  at a constant current density of  $-10 \text{ mA} \cdot \text{cm}^{-2}$ , gray,  $\text{CO}_2$  at open circuit potential (OCP). Markers, data; lines, fits using the following functions: blue, power law, cyan, exponential asymptotic, gray, line (A). GC data for  $\text{CO}_2$  at a constant current density of  $-10 \text{ mA} \cdot \text{cm}^{-2}$  as a function of electrocatalysis time (B).

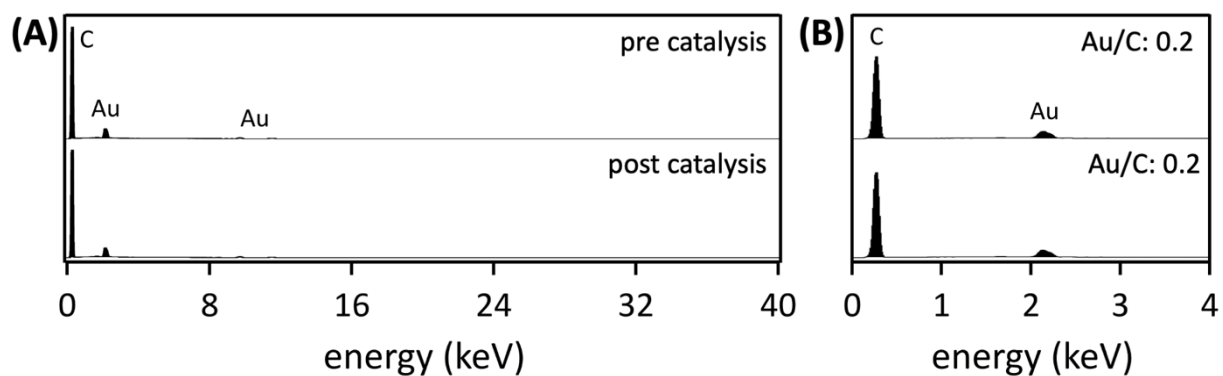

**Figure S5:** EDX spectra of pulsed laser grafted gold nanoparticle–hydrophilic carbon fiber paper composites before and after 2 h of electrocatalysis at a constant current density of  $-10 \text{ mA}\cdot\text{cm}^{-2}$ , showing the full energy axis (A) and an expanded energy axis (B).

**Table S1:** Relative contents of surface carbon oxygenates, the  $\pi$ – $\pi^*$  shake-up peak, and gold species with respect to the sum of graphitic and adventitious carbon content.

| species                                  | hydrophilic carbon fiber paper |                           | laser grafted gold nanoparticle–hydrophilic carbon fiber paper composites |                           |
|------------------------------------------|--------------------------------|---------------------------|---------------------------------------------------------------------------|---------------------------|
|                                          | central binding energy (eV)    | relative content (atom %) | central binding energy (eV)                                               | relative content (atom %) |
| graphitic carbon                         | 284.7                          | 90.2                      | 284.7                                                                     | 90.4                      |
| adventitious carbon                      | 284.8                          | 9.8                       | 284.8                                                                     | 9.6                       |
| $\underline{\text{C}}=\text{O}$          | 286.0                          | 6.0                       | 286.4                                                                     | 1.7                       |
| $\underline{\text{C}}-\text{O}$          | 287.0                          | 5.2                       | 287.6                                                                     | 1.5                       |
| $\text{O}-\underline{\text{C}}=\text{O}$ | 288.9                          | 2.0                       | 288.5                                                                     | 1.1                       |
| $\pi$ – $\pi^*$ shake-up peak            | 291.1                          | 4.8                       | 291.2                                                                     | 10.5                      |
| $\text{Au}^0$                            | –                              | –                         | 84.3                                                                      | 1.4                       |
| $\text{Au}^{3+}$                         | –                              | –                         | 86.4                                                                      | 0.1                       |
| $\text{Au}^0$                            | –                              | –                         | 88.0                                                                      | 1.1                       |
| $\text{Au}^{3+}$                         | –                              | –                         | 90.3                                                                      | 0.1                       |
